# Supplementary material
Source: HighWire-hosted journal article supplement (https://bmjopen.bmj.com/content/8/2/e020478)
Supplement: inline-supplementary-material-2 [file inline-supplementary-material-2.pdf]

**Supplementary Table 1.** Characteristics of the children born at gestational age <27 weeks with or without high quality MRI

|                                                    | <b>High quality MRI</b><br><b>n=34</b> | <b>Low quality MRI</b><br><b>n=32</b> | <b><i>p</i></b> |
|----------------------------------------------------|----------------------------------------|---------------------------------------|-----------------|
| Gestational age at birth, weeks, median (range)    | 25.85 (23.4-26.6)                      | 25.45 (23.4-26.6)                     | 0.16            |
| Birth weight, grams, mean (SD)                     | 857 (154)                              | 820 (47)                              | 0.33            |
| Gender, girls/boys, n                              | 15/19                                  | 14/18                                 | 1.00            |
| Small for gestational age, n                       | 1                                      | 3                                     | 0.35            |
| Prenatal steroids, n                               | 32                                     | 28                                    | 0.42            |
| Premature rupture of the membranes, n              | 10                                     | 9                                     | 1.00            |
| Cesarean section, n                                | 16                                     | 16                                    | 1.00            |
| Sepsis, n                                          | 24                                     | 27                                    | 0.24            |
| Days of mechanical ventilation, median (range)     | 3 (0-37)                               | 11 (0-55)                             | <b>0.04</b>     |
| Postnatal steroids, n                              | 4                                      | 7                                     | 0.33            |
| Bronchopulmonary Dysplasia, oxygen at 36 weeks, n  | 12                                     | 14                                    | 0.62            |
| Necrotizing enterocolitis, n                       | 1                                      | 5                                     | 0.10            |
| Patent ductus arteriosus, ligation, n              | 9                                      | 11                                    | 0.60            |
| Laser treatment for retinopathy of prematurity , n | 2                                      | 6                                     | 0.14            |
| Intraventricular hemorrhage grade I-II, n          | 10                                     | 13                                    | 0.44            |
| Mild white matter abnormality, n                   | 18                                     | 12                                    | 0.09            |
| Gestational age at MRI, weeks, median (range)      | 40.79 (39.14-45.28)                    | 40.28 (39.14-43.28)                   | 0.08            |
| Age at 6.5 year assessment, months, median (range) | 77.20 (75.29-80.18)                    | 77.23 (76.03-86.33)                   | 0.59            |
| VMI standard score, mean (SD)                      | 94 (10)                                | 91 (9)                                | 0.20            |
| M-ABC-2 manual dexterity score, mean (SD)          | 8 (2)                                  | 7 (3)                                 | 0.68            |

All children were without cerebral palsy, focal brain lesions or severe white matter abnormalities. SD = Standard deviation, MRI = Magnetic Resonance Imaging, VMI=Visual-motor integration, M-ABC-2=Movement Assessment Battery for Children-2
